# Supplementary material for: Measurement of scattering and absorption properties of dust aerosol in a Gobi farmland region of northwest China — a potential anthropogenic influence
Source: Copernicus journal article supplement (doi:10.5194/acp-2017-165), 2017-03-01
Supplement: Supplementary file [file acp-2017-165-AC2-supplement.pdf]

1 *Supplement of*  
2 **Measurement of scattering and absorption properties of dust aerosol**  
3 **in a Gobi farmland region of northwest China—a potential**  
4 **anthropogenic influence**

5 Jianrong Bi, Jianping Huang, Jinsen Shi, Zhiyuan Hu, Tian Zhou, Guolong Zhang,  
6 Zhongwei Huang, Xin Wang, and Hongchun Jin

7

8 Key Laboratory for Semi-Arid Climate Change of the Ministry of Education, College of  
9 Atmospheric Sciences, Lanzhou University, Lanzhou 730000, China

10

11 *Correspondence to:* Jianping Huang (hjp@lzu.edu.cn)

12

13

14

15

16

17

18

19

20

21

22

23

24

25

26

27

28

29

30

31

32

33

34

35

36

37

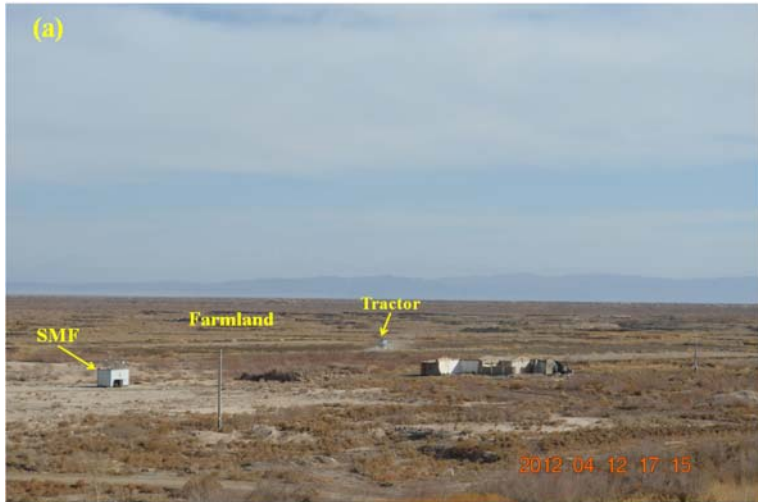

38

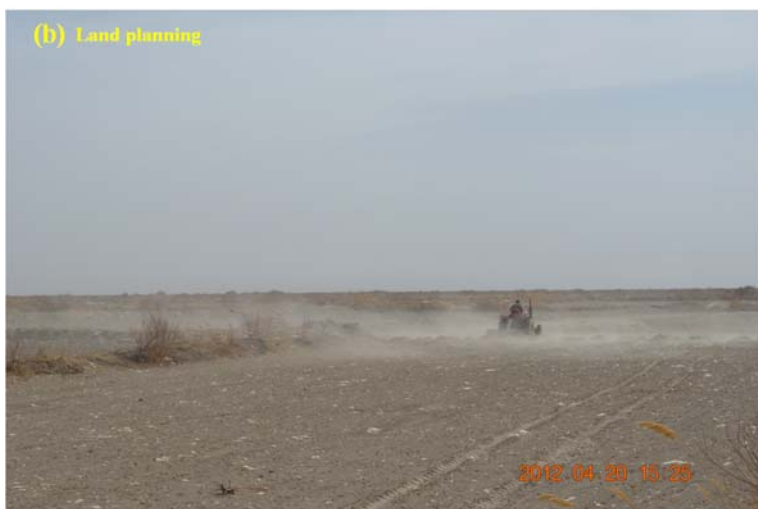

39

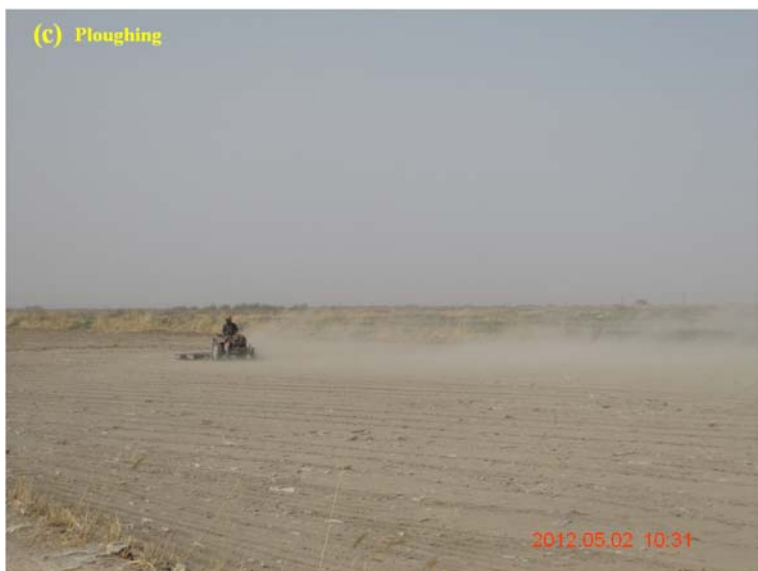

40

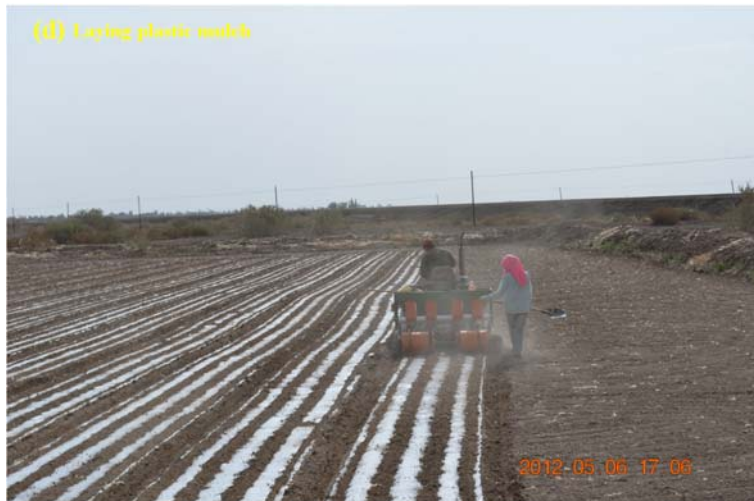

41

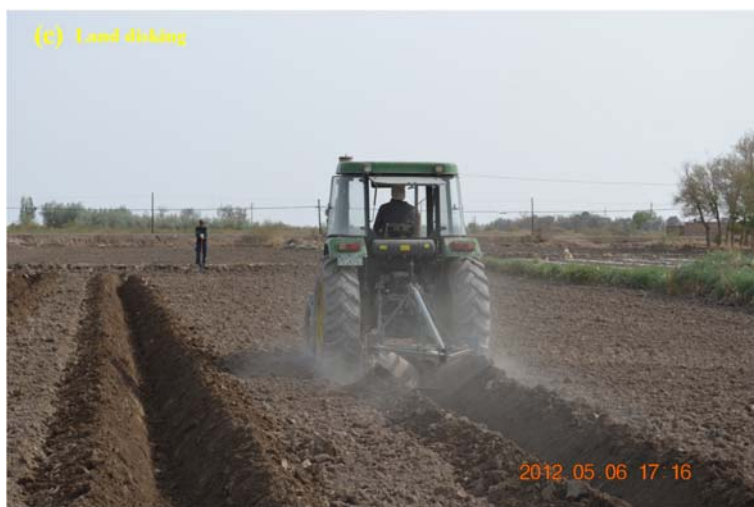

42

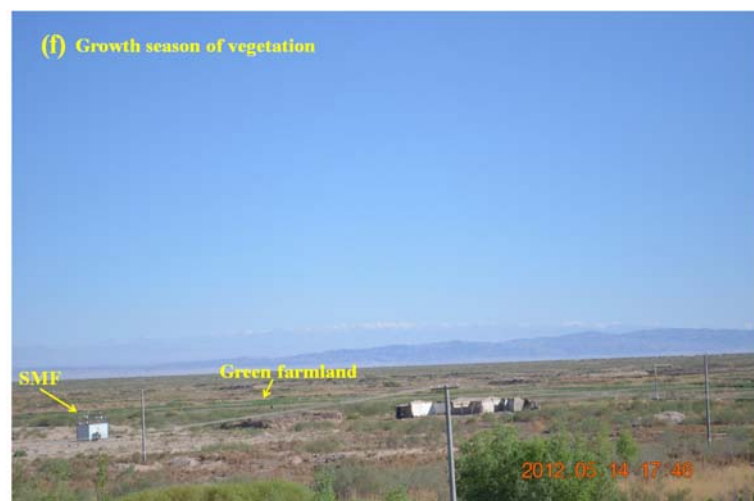

43

44 **Figure S1.** A variety of agricultural cultivations in Dunhuang farmland (40.492°N, 94.955°E,  
45 altitude: 1061 m) prior to the growing season (i.e. from 1 April to 10 May, 2012), producing  
46 massive soil dust in the source and downwind regions. (a) The deployment of SACOL's Mobile  
47 Facility (SMF) and its adjacent bare farmlands. A tractor was plowing in the nearby farmland on  
48 12 April 2012. (b) Land planning at the afternoon on 20 April, 2012, for the furrow-irrigated land  
49 preparation. (c) A ploughing tractor generated a great amount of tiny soil particles into the

50 atmosphere at the forenoon on 2 May, 2012. (d) An open-cabin tractor was laying plastic mulch  
51 nearby the SMF at the afternoon on 6 May, 2012. (e) Land disking for planting at the afternoon on  
52 6 May, 2012. (f) The crops in Dunhuang farmland (nearby SMF) gradually become green on 14  
53 May, 2012, indicating the coming of growth season.

54  
55  
56  
57

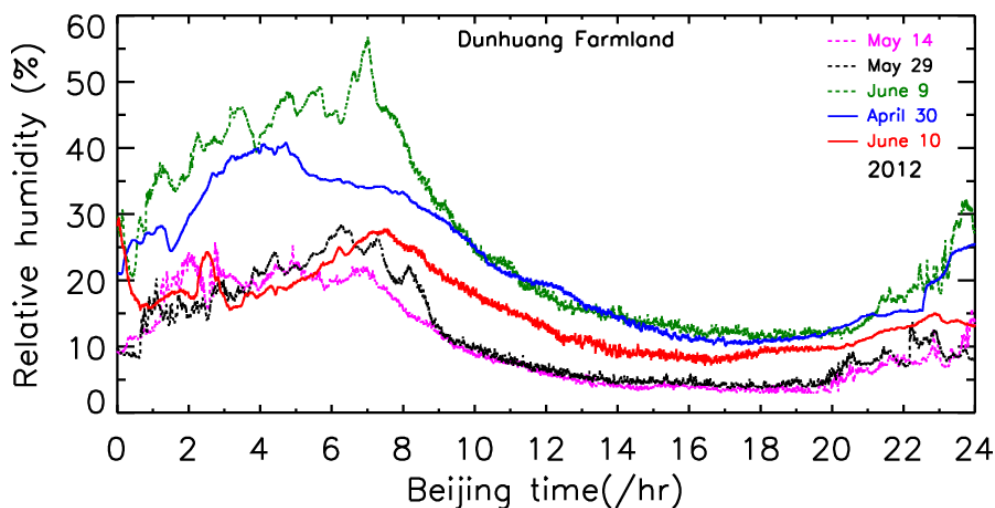

58

59 **Figure S2.** Diurnal variations of 10-second average relative humidity (RH, %) under completely  
60 clear-sky conditions (14 May, 29 May, and 9 June) and dust events (30 April and 10 June) in  
61 Dunhuang farmland. The RH and other meteorological variables were observed by a weather  
62 transmitter (Model WXT-520, Vaisala, Finland).
